# Supplementary material for: Mapping chemotherapeutic drug distribution in cancer cell spheroids using 2D-TOF-SIMS and LESA-TIMS-MS
Source: Royal Society of Chemistry journal article supplement (doi:10.1039/c9an02245g), 2020-01-01
Supplement: c9an02245g1.pdf [file c9an02245g1.pdf]

## Supplementary Information

### Mapping chemotherapeutic drug distribution in cancer cell spheroids using 2D-TOF-SIMS and LESA-TIMS-MS

Yarixa L. Cintron-Diaz<sup>a</sup>, Arlet M. Acanda de la Rocha<sup>b</sup>, Anthony Castellanos<sup>a</sup>, Jeremy Chambers<sup>b</sup> and Francisco Fernandez-Lima<sup>a</sup>.

<sup>a</sup> Department of Chemistry and Biochemistry, Florida International University, Miami, Florida 33199

<sup>b</sup> Department of Environmental Health Sciences, Florida International University, 11200 SW 8<sup>th</sup> St., AHC4-233, Miami, FL 33199, United States.

#### corresponding author:

Francisco Fernandez-Lima, email: fernandf@fiu.edu

#### Table of contents:

|                                    |   |
|------------------------------------|---|
| Figure SI1: TOF-SIMS spectra ..... | 2 |
|------------------------------------|---|

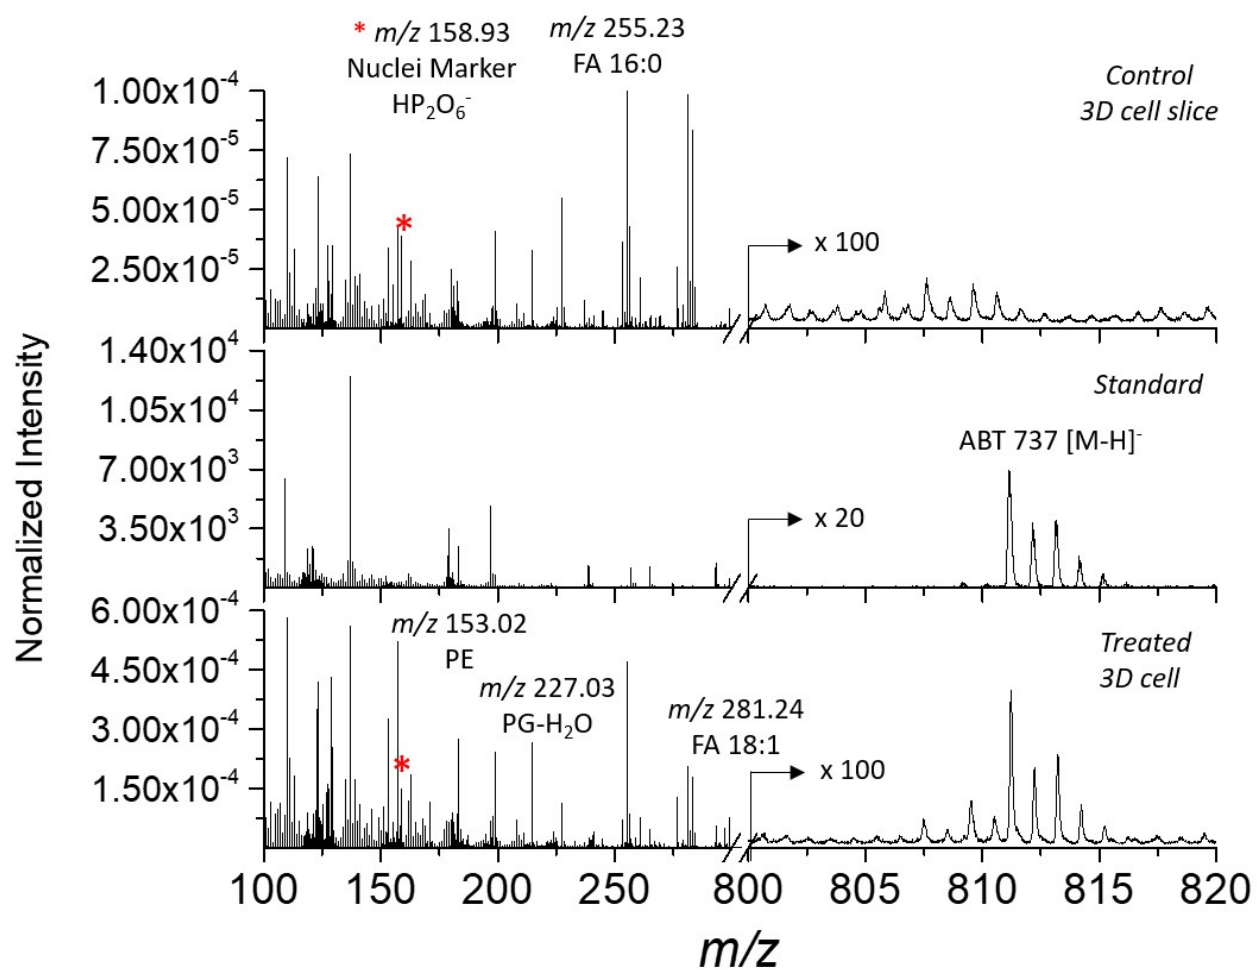

**Figure SI1.** Mass spectra comparing the control 3D cell spheroid slice (top), ABT-737 10  $\mu\text{M}$  standard (center) and treated spheroid with 50  $\mu\text{M}$  ABT 737 (bottom).
